# Supplementary material for: Differential effects of cyclo-oxygenase 1 and 2 inhibition on angiogenesis inhibitor-induced hypertension and kidney damage
Source: Oxford University Press journal article supplement (doi:10.1042/cs20220182), 2022-04-20

## Supplemental Figs

**Supplemental Figure 1.** Representative light microscopy images of kidney sections stained with PAS following treatment with **(A)** vehicle, **(B)** sunitinib (14 mg/kg/day; SU) alone or during co-treatment with **(C)** low-dose aspirin (COX-1 inhibition, 5 mg/kg/day; SU+low-dose A) or **(D)** high-dose aspirin (dual COX-1 and COX-2 inhibition, 100 mg/kg/day; SU+high-dose A). Magnification 40x.

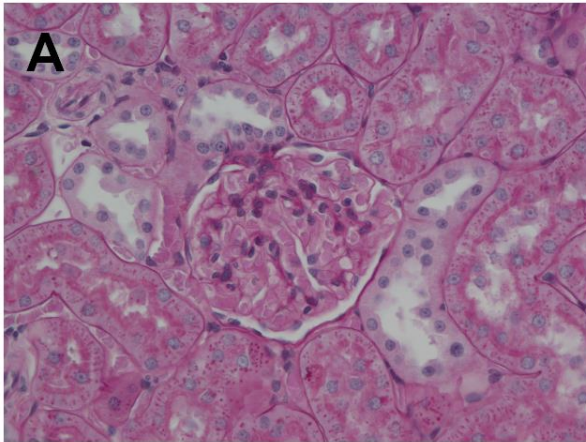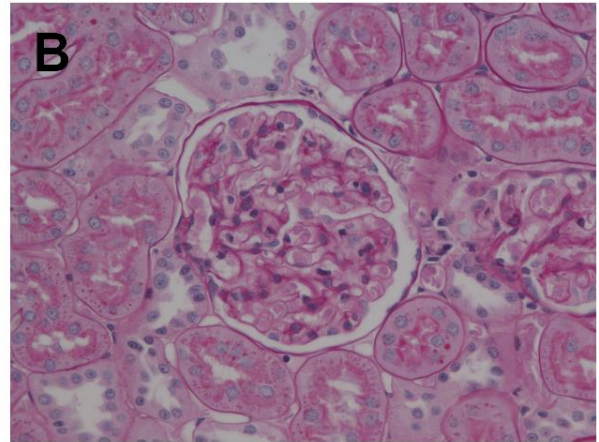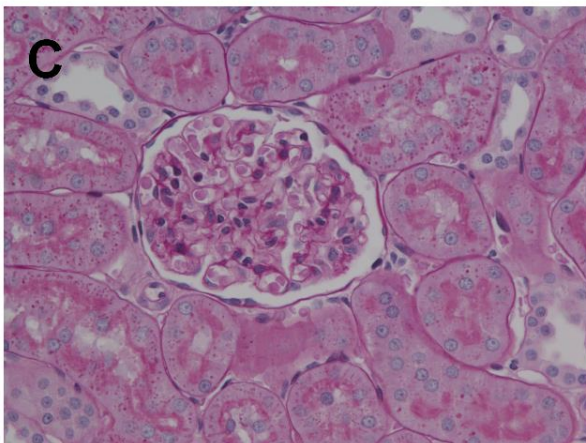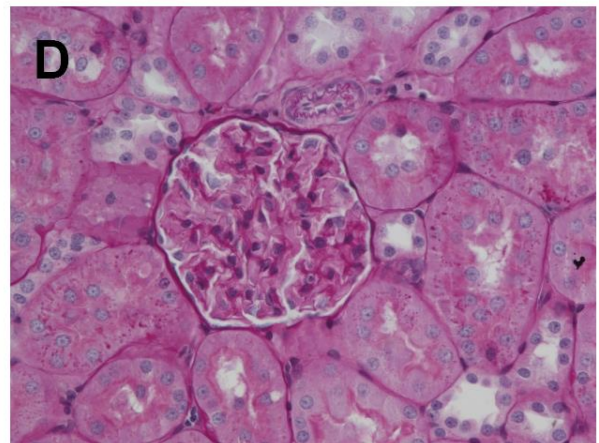

**Supplemental Figure 2.** Transmission electron micrographs of kidney sections from WKY rats treated with (A-B) vehicle or (C-D) sunitinib (14 mg/kg/day; SU). (A-B) normal capillary lumina (number sign) and endothelial cells with preserved fenestration (arrows) in vehicle treated rats. (C-D) endothelial swelling, indicative of endothelial activation (asterix) and mild loss of endothelial fenestrations (arrowheads). RBC indicates red blood cell.

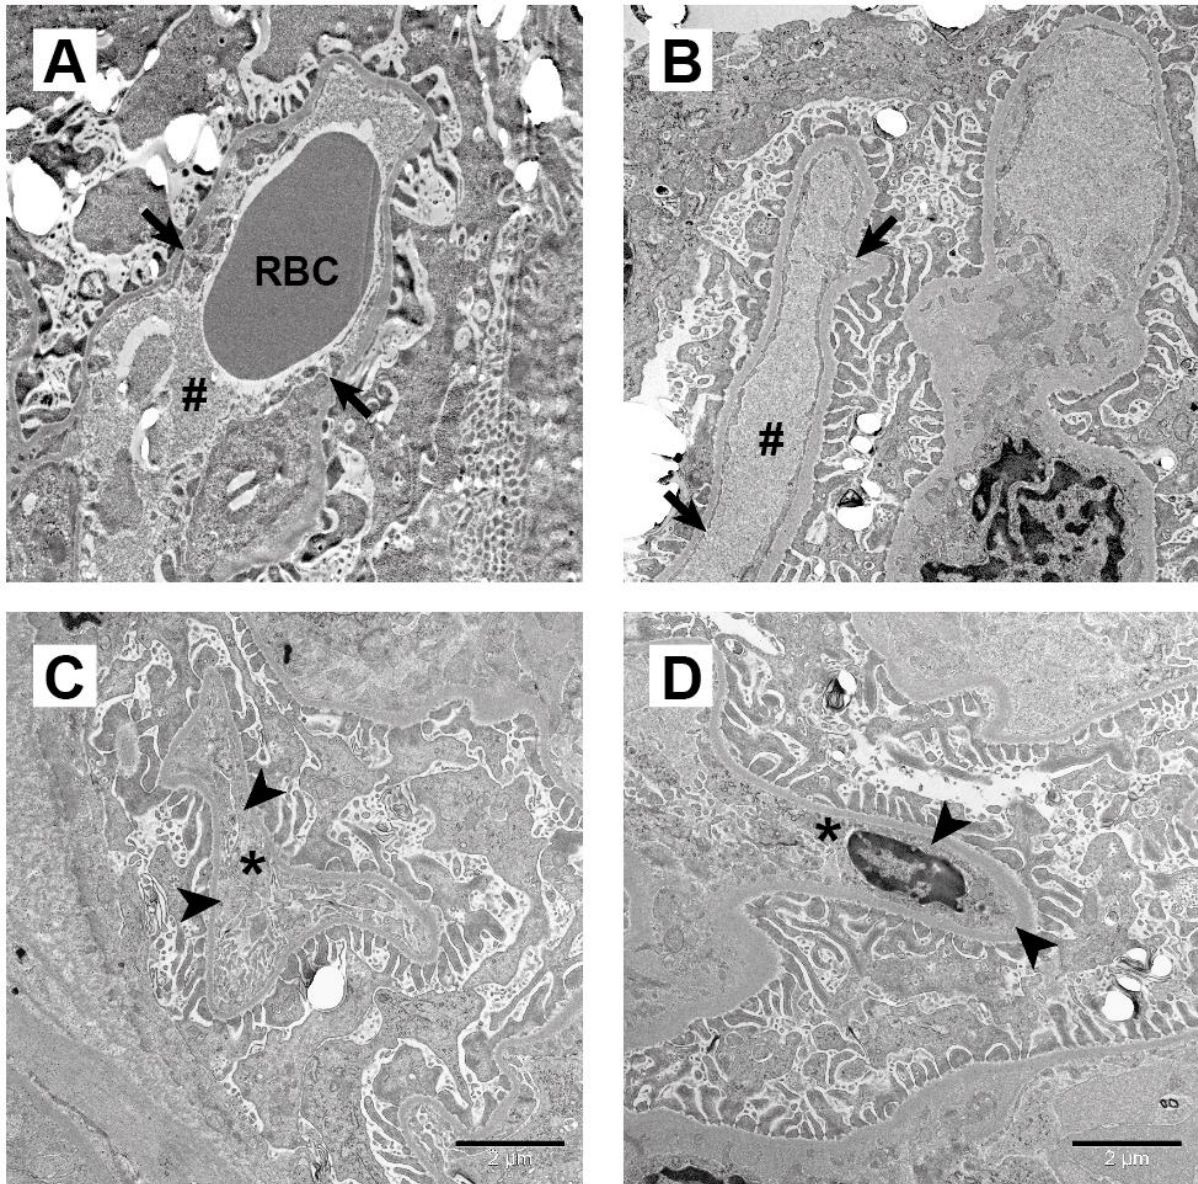



**Supplemental Figure 3.** Renal mRNA expression of **(A)** vascular endothelial growth factor (VEGF), **(B)** cyclooxygenase (COX)-1, **(C)** COX-2, **(D)** PGI<sub>2</sub> synthase and **(E)** TXA<sub>2</sub> synthase following treatment with vehicle, sunitinib (14 mg/kg/day; SU) alone or during co-treatment with low-dose aspirin (COX-1 inhibition, 5 mg/kg/day; SU+low-dose A) or high-dose aspirin (dual COX-1 and COX-2 inhibition, 100 mg/kg/day; SU+high-dose A). Renal mRNA expression is normalized to the internal housekeeping gene hypoxanthine phosphoribosyltransferase-1 (Hprt1) and are expressed relative to the vehicle treated group. Data are presented as mean  $\pm$  SEM (n=5-7/group). Data were analyzed using a one-way ANOVA.

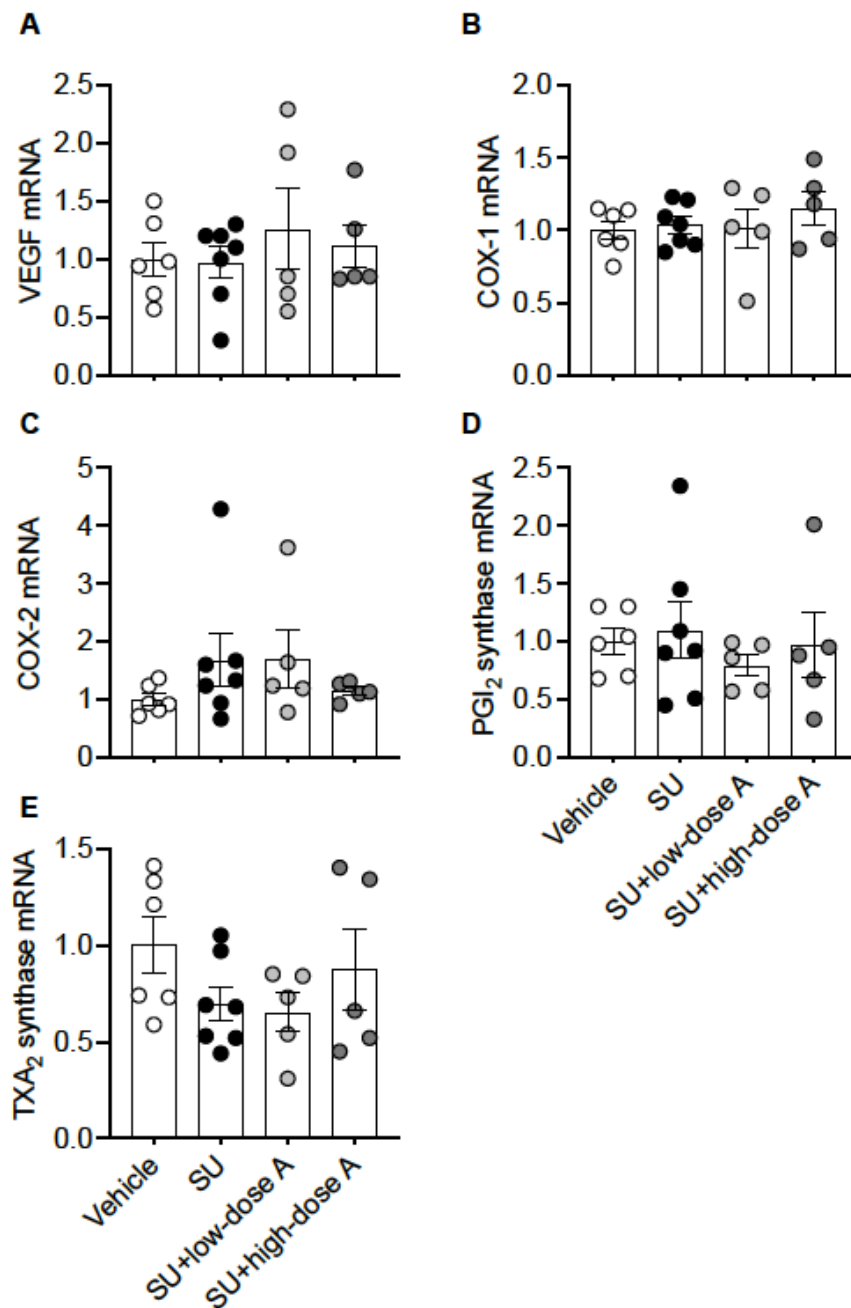

Supplement: cs-2022-0182_supp.pdf [file cs-2022-0182_supp.pdf]
